# Supplementary material for: Ecological niche and interspecific relationship of dominant bryophyte communities in stone walls of cities at different elevations, Guizhou, China
Source: Research Square preprint supplement (doi:10.21203/rs.3.rs-3430355/v1), 2023-10-16
Supplement: Supplementary file 1 [file 74a1ee2ca5df17a098963f07.pdf]

Supplementary table 1 The cross-species pairs of dominant bryophyte species at different elevations in urban areas were  $\chi^2$  test matrix

|        |        |        |        |        |        |        |        |        |        |        |        |        |        |        |    |    |
|--------|--------|--------|--------|--------|--------|--------|--------|--------|--------|--------|--------|--------|--------|--------|----|----|
| 1      |        |        |        |        |        |        |        |        |        |        |        |        |        |        |    | E1 |
| 0.882  | 2      |        |        |        |        |        |        |        |        |        |        |        |        |        |    |    |
| -0.025 | -0.430 | 3      |        |        |        |        |        |        |        |        |        |        |        |        |    |    |
| 1.637  | 3.289  | -0.494 | 4      |        |        |        |        |        |        |        |        |        |        |        |    |    |
| -0.148 | -2.508 | 0.785  | -2.881 | 5      |        |        |        |        |        |        |        |        |        |        |    |    |
| -0.280 | -4.732 | -0.280 | -3.656 | -1.637 | 6      |        |        |        |        |        |        |        |        |        |    |    |
| -0.055 | 3.503  | -0.055 | -1.074 | -0.323 | -0.610 | 7      |        |        |        |        |        |        |        |        |    |    |
| -0.433 | -7.320 | -0.434 | -8.408 | -2.178 | 1.799  | -0.944 | 8      |        |        |        |        |        |        |        |    |    |
| -0.171 | -1.845 | -0.172 | -2.338 | -1.002 | 2.926  | -0.374 | -2.926 | 9      |        |        |        |        |        |        |    |    |
| -0.195 | 1.521  | 1.443  | 2.886  | 2.002  | -2.148 | -0.424 | -2.745 | -0.837 | 10     |        |        |        |        |        |    |    |
| -0.218 | -0.646 | 0.484  | 7.391  | -0.034 | -1.719 | -0.476 | -3.727 | -0.399 | 3.211  | 11     |        |        |        |        |    |    |
| -0.040 | -0.669 | -0.040 | 2.162  | -0.231 | -0.437 | -0.086 | -0.676 | -0.267 | -0.304 | -0.341 | 12     |        |        |        |    |    |
| -0.278 | 3.126  | -0.279 | 8.945  | -1.629 | -3.073 | -0.607 | -4.753 | -1.882 | -0.814 | 0.269  | 2.381  | 13     |        |        |    |    |
| -0.165 | -2.800 | 0.511  | -3.216 | 4.894  | 0.261  | -0.361 | -2.827 | 0.332  | 0.180  | -0.392 | -0.258 | -1.818 | 14     |        |    |    |
| -0.042 | -0.704 | -0.042 | -0.808 | -0.243 | 0.689  | -0.091 | 1.005  | -0.281 | -0.320 | -0.358 | -0.065 | -0.457 | -0.272 | 15     |    |    |
| 0.370  | -1.678 | 0.625  | -0.314 | 2.024  | -1.997 | -0.395 | -0.238 | -1.223 | 1.069  | 0.999  | 0.450  | -0.481 | 1.779  | -0.297 | 16 |    |
| 1      |        |        |        |        |        |        |        |        |        |        |        |        |        |        |    | E2 |
| -0.072 | 2      |        |        |        |        |        |        |        |        |        |        |        |        |        |    |    |
| -0.080 | -0.097 | 3      |        |        |        |        |        |        |        |        |        |        |        |        |    |    |
| -0.006 | 0.535  | -0.160 | 4      |        |        |        |        |        |        |        |        |        |        |        |    |    |
| -0.138 | 0.005  | -0.017 | -0.259 | 5      |        |        |        |        |        |        |        |        |        |        |    |    |
| -0.112 | -0.135 | -0.073 | -0.206 | -0.085 | 6      |        |        |        |        |        |        |        |        |        |    |    |
| -0.045 | -0.055 | -0.061 | -0.091 | -0.105 | 0.453  | 7      |        |        |        |        |        |        |        |        |    |    |
| 0.098  | -0.096 | -0.106 | -0.023 | -0.068 | -0.110 | -0.060 | 8      |        |        |        |        |        |        |        |    |    |
| -0.045 | -0.055 | -0.061 | -0.091 | -0.029 | 0.092  | -0.034 | -0.060 | 9      |        |        |        |        |        |        |    |    |
| -0.075 | 0.473  | -0.101 | 0.269  | 0.066  | -0.140 | -0.057 | -0.100 | -0.057 | 10     |        |        |        |        |        |    |    |
| -0.066 | 0.225  | -0.088 | 0.090  | -0.152 | -0.123 | -0.050 | 0.735  | -0.050 | 0.218  | 11     |        |        |        |        |    |    |
| -0.045 | -0.055 | 0.345  | -0.091 | -0.105 | -0.085 | -0.034 | -0.060 | -0.034 | -0.057 | -0.050 | 12     |        |        |        |    |    |
| -0.056 | -0.067 | -0.074 | 0.040  | -0.129 | 0.573  | -0.042 | -0.074 | -0.042 | -0.070 | -0.061 | -0.042 | 13     |        |        |    |    |
| -0.081 | -0.098 | 0.043  | -0.162 | -0.043 | -0.049 | -0.062 | -0.108 | -0.062 | -0.102 | -0.089 | -0.062 | -0.075 | 14     |        |    |    |
| -0.061 | 0.352  | -0.082 | 0.225  | -0.014 | -0.114 | -0.046 | 0.092  | -0.046 | 0.625  | 0.256  | -0.046 | -0.057 | -0.083 | 15     |    |    |
| -0.029 | -0.020 | -0.103 | 0.062  | -0.177 | -0.143 | -0.058 | -0.044 | -0.058 | -0.076 | -0.071 | -0.058 | -0.071 | -0.104 | -0.078 | 16 |    |
| 1      |        |        |        |        |        |        |        |        |        |        |        |        |        |        |    | E3 |
| -0.084 | 2      |        |        |        |        |        |        |        |        |        |        |        |        |        |    |    |
| -0.034 | -0.084 | 3      |        |        |        |        |        |        |        |        |        |        |        |        |    |    |
| 0.553  | 0.386  | -0.024 | 4      |        |        |        |        |        |        |        |        |        |        |        |    |    |
| -0.151 | -0.322 | -0.151 | -0.375 | 5      |        |        |        |        |        |        |        |        |        |        |    |    |
| -0.034 | -0.084 | -0.034 | -0.131 | 0.074  | 6      |        |        |        |        |        |        |        |        |        |    |    |
| -0.034 | 0.285  | -0.034 | -0.131 | -0.019 | -0.034 | 7      |        |        |        |        |        |        |        |        |    |    |
| -0.100 | 0.220  | -0.100 | -0.059 | 0.031  | -0.100 | -0.100 | 8      |        |        |        |        |        |        |        |    |    |
| -0.034 | -0.084 | -0.034 | -0.070 | 0.131  | -0.034 | -0.034 | -0.100 | 9      |        |        |        |        |        |        |    |    |
| -0.079 | 0.197  | -0.079 | -0.028 | -0.308 | -0.079 | -0.079 | -0.075 | -0.079 | 10     |        |        |        |        |        |    |    |
| -0.061 | -0.052 | -0.061 | -0.186 | -0.092 | -0.061 | -0.061 | -0.078 | -0.061 | -0.021 | 11     |        |        |        |        |    |    |
| -0.034 | -0.084 | -0.034 | -0.070 | 0.131  | -0.034 | -0.034 | -0.100 | 1.000  | -0.079 | -0.061 | 12     |        |        |        |    |    |
| -0.062 | 0.297  | -0.062 | 0.175  | 0.121  | -0.062 | -0.062 | 0.222  | 0.635  | -0.141 | -0.109 | 0.635  | 13     |        |        |    |    |
| -0.034 | -0.084 | -0.034 | 0.148  | -0.151 | -0.034 | -0.034 | -0.100 | -0.034 | 0.113  | -0.061 | -0.034 | -0.062 | 14     |        |    |    |
| -0.093 | -0.058 | 0.068  | -0.318 | -0.265 | 0.045  | 0.381  | -0.065 | -0.093 | -0.213 | 0.118  | -0.093 | -0.166 | -0.093 | 15     |    |    |
| -0.157 | -0.040 | -0.157 | -0.035 | 0.206  | 0.191  | -0.157 | 0.181  | -0.157 | 0.039  | -0.155 | -0.157 | -0.146 | -0.157 | -0.226 | 16 |    |

|        |        |        |        |        |        |        |        |        |        |        |        |        |        |        |    |  |
|--------|--------|--------|--------|--------|--------|--------|--------|--------|--------|--------|--------|--------|--------|--------|----|--|
| 1      |        |        |        |        |        |        |        |        |        |        |        |        |        |        |    |  |
| 0.104  | 2      |        |        |        |        |        |        |        |        |        |        |        |        |        |    |  |
| -0.097 | -0.141 | 3      |        |        |        |        |        |        |        |        |        |        |        |        |    |  |
| 0.144  | 0.102  | -0.008 | 4      |        |        |        |        |        |        |        |        |        |        |        |    |  |
| -0.137 | -0.145 | -0.092 | -0.215 | 5      |        |        |        |        |        |        |        |        |        |        |    |  |
| -0.135 | -0.197 | -0.091 | -0.212 | -0.129 | 6      |        |        |        |        |        |        |        |        |        |    |  |
| -0.093 | 0.264  | -0.062 | -0.163 | -0.089 | -0.021 | 7      |        |        |        |        |        |        |        |        |    |  |
| -0.070 | 0.069  | -0.047 | -0.124 | -0.067 | -0.066 | -0.045 | 8      |        |        |        |        |        |        |        |    |  |
| -0.070 | 0.069  | -0.047 | -0.124 | -0.067 | -0.066 | -0.045 | 1.000  | 9      |        |        |        |        |        |        |    |  |
| 0.017  | -0.190 | -0.002 | 0.165  | 0.047  | -0.130 | 0.028  | -0.107 | -0.107 | 10     |        |        |        |        |        |    |  |
| -0.082 | -0.120 | -0.055 | -0.144 | -0.078 | -0.077 | -0.053 | -0.040 | -0.040 | -0.105 | 11     |        |        |        |        |    |  |
| -0.070 | -0.103 | -0.047 | 0.008  | -0.067 | -0.066 | -0.045 | -0.034 | -0.034 | -0.107 | -0.040 | 12     |        |        |        |    |  |
| -0.138 | 0.152  | -0.092 | -0.166 | -0.048 | -0.093 | -0.007 | -0.067 | -0.067 | -0.042 | -0.078 | -0.067 | 13     |        |        |    |  |
| 0.138  | 0.001  | -0.094 | -0.148 | 0.226  | -0.131 | -0.090 | -0.068 | -0.068 | 0.234  | 0.547  | -0.068 | -0.028 | 14     |        |    |  |
| -0.070 | -0.103 | 0.880  | -0.124 | -0.067 | -0.066 | -0.045 | -0.034 | -0.034 | -0.107 | -0.040 | -0.034 | -0.067 | -0.068 | 15     |    |  |
| 0.051  | 0.135  | -0.147 | -0.010 | 0.090  | 0.031  | -0.141 | -0.107 | -0.107 | -0.172 | 0.092  | 0.164  | -0.178 | 0.119  | -0.107 | 16 |  |
